# Supplementary material for: Anti-EGFR antibody 528 binds to domain III of EGFR at a site shifted from the cetuximab epitope
Source: PubMed Central journal article supplement (PMC7952593; doi:10.1038/s41598-021-84171-3), 2021-03-11
Supplement: 41598_2021_84171_MOESM1_ESM.pdf [file 41598_2021_84171_MOESM1_ESM.pdf]

## **Anti-EGFR antibody 528 binds to domain III of EGFR at a site shifted from the Cetuximab epitope**

Koki Makabe<sup>1</sup>, Takeshi Yokoyama<sup>2,3</sup>, Shiro Uehara<sup>2</sup>, Tomomi Uchikubo-kamo<sup>3</sup>, Mikako Shirouzu<sup>3</sup>, Kouki Kimura<sup>4</sup>, Kohei Tsumoto<sup>5, 6</sup>, Ryutaro Asano<sup>4</sup>, Yoshikazu Tanaka<sup>2</sup>, and Izumi Kumagai<sup>\*,4</sup>

<sup>1</sup>Graduate School of Science and Engineering, Faculty of Engineering, Yamagata University, 4-3-16 Jonan, Yonezawa 992-8510, Japan

<sup>2</sup>Graduate School of Life Sciences, Tohoku University, 2-1-1 Katahira, Aoba-ku, Sendai 980-8577, Japan

<sup>3</sup>Laboratory for Protein Functional and Structural Biology, RIKEN Center for Biosystems Dynamics Research, Tsurumi-ku, Yokohama 230-0045, Japan

<sup>4</sup>Department of Biotechnology and Life Science, Graduate School of Engineering, Tokyo University of Agriculture and Technology, 2-24-16 Nakacho, Koganei, Tokyo 184-8588, Japan

<sup>5</sup>School of Engineering, The University of Tokyo, 7-3-1, Hongo, Bunkyo-ku, Tokyo 113-8656, Japan

<sup>6</sup>The Institute of Medical Science, The University of Tokyo, 4-6-1, Shirokanedai, Minato-ku, Tokyo 108-8639, Japan

\*To whom correspondence should be addressed: [kmiz@kuma.che.tohoku.ac.jp](mailto:kmiz@kuma.che.tohoku.ac.jp)

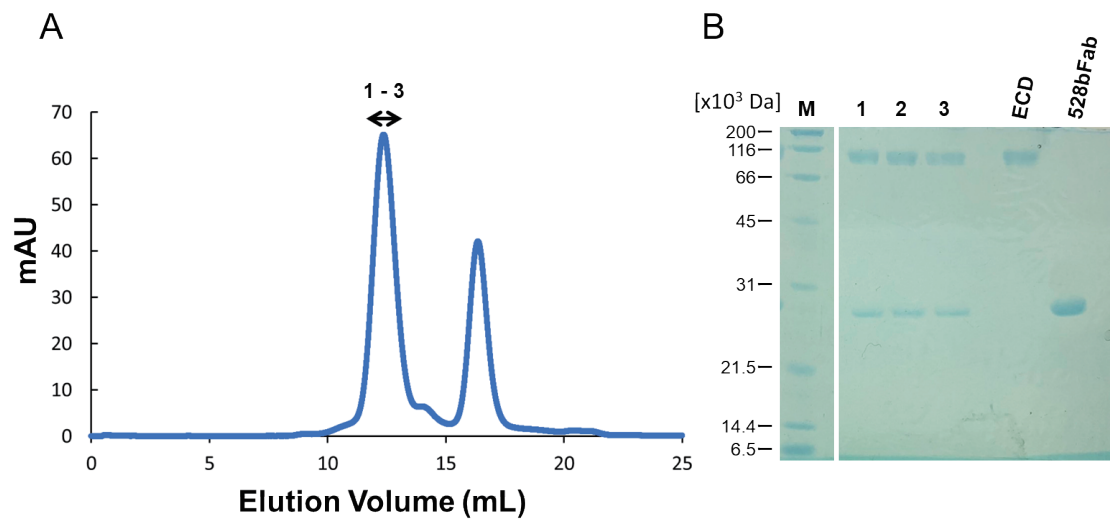

Supplementary Figure 1 Purification of 528b Fab-bound EGFR using gel filtration chromatography. (A) Chromatogram of SEC with Superdex 200 10/300 GL. (B) SDS-PAGE of the peak of SEC. As a reference, purified ECD and 528bFab were also loaded. A marker lane is shown for clarity.
